# Supplementary material for: Ultralow sulfur diesel production with defective 12-molybdophosphoric acid polyoxometalate
Source: Royal Society of Chemistry journal article supplement (doi:10.1039/d4nj02368d), 2024-01-01
Supplement: d4nj02368d1.pdf [file d4nj02368d1.pdf]

## Supplementary Materials

Synthesis of highly dispersed 12-molybdophosphoric acid catalysts with defective structure and strong acidity for ultralow sulfur diesel production

**Table SM1. The Atomic Fraction Coordinates of Orthorhombic Structure of  $\alpha$ -MoO<sub>3</sub> Phase. Space Group *Pbnm* (No. 62)**

| Atoms | Site | x      | y      | z    |
|-------|------|--------|--------|------|
| Mo    | 4 c  | 0.0894 | 0.1054 | 0.25 |
| O(1)  | 4 c  | 0.5860 | 0.4384 | 0.25 |
| O(2)  | 4 c  | 0.0388 | 0.0739 | 0.25 |
| O(3)  | 4 c  | 0.0455 | 0.2238 | 0.25 |

**Table SM2. The Atomic Fraction Coordinates of Monoclinic Structure of  $\beta$ -MoO<sub>3</sub> Phase. Space Group *P21/m* (No. 11)**

| Atoms | Site | x       | y     | z      |
|-------|------|---------|-------|--------|
| Mo    | 2 e  | 0.3833  | 0.25  | 0.2236 |
| O(1)  | 2 e  | 0.4690  | -0.25 | 0.3087 |
| O(2)  | 2 e  | -0.2786 | 0.25  | 0.3213 |
| O(3)  | 2 e  | 0.3916  | 0.25  | 0.0629 |
